# Supplementary material for: Magnetic and Luminescence Properties of 8-Coordinate Holmium(III) Complexes Containing 4,4,4-Trifluoro-1-Phenyl- and 1-(Naphthalen-2-yl)-1,3-Butanedionates
Source: MDPI journal article supplement (doi:10.3390/molecules27031129), 2022-02-08
Supplement: s1 [file s1]

# SUPPLEMENTARY MATERIAL

## Magnetic and Luminescence Properties of 8-Coordinate Holmium(III) Complexes Containing 4,4,4-Trifluoro-1-phenyl- and 1-(naphthalen-2-yl)-1,3-butanedionates

Franz A. Mautner<sup>1,\*</sup>, Florian Bierbaumer<sup>1</sup>, Ramon Vicente<sup>2</sup>, Saskia Speed<sup>2</sup>, Annia Tubau<sup>2</sup>, Mercè Font-Bardía<sup>3</sup>, Roland Fischer<sup>4</sup>, Salah S. Massoud<sup>5,6,\*</sup>

<sup>1</sup> *Institut für Physikalische und Theoretische Chemie, Technische Universität Graz, Stremayrgasse 9, A-8010 Graz, Austria*

<sup>2</sup> *Departament de Química Inorgànica i Orgànica, Universitat de Barcelona, Martí i Franquès 1-11, E-08028 Barcelona, Spain*

<sup>3</sup> *Departament de Mineralogia, Cristallografia i Dipòsits Minerals and Unitat de Difracció de R-X. Centre Científic i Tecnològic de la Universitat de Barcelona (CCiTUB). Universitat de Barcelona. Solé i Sabarís 1-3. 08028 Barcelona, Spain*

<sup>4</sup> *Institut für Anorganische Chemie, Technische Universität Graz, Stremayrgasse 9, A-8010 Graz, Austria*

<sup>5</sup> *Department of Chemistry, University of Louisiana at Lafayette, P.O. Box 43700, Lafayette, LA 70504, U.S.A.*

<sup>6</sup> *Department of Chemistry, Faculty of Sciences, Alexandria University, Moharam Bey 21511, Alexandria, Egypt*

\* Correspondence: E-mail:mautner@tugraz.at, Tel.: +43-316-873-32270, Fax: +43-316-873-8225 (F.A.M.); E-mail: ssmassoud@louisiana.edu, Tel. +01 337-482-5672, Fax: +01 337-482-5676 (S.S. Massoud)

### Contents

| Title                                                                                                | page # |
|------------------------------------------------------------------------------------------------------|--------|
| <b>Figures S1a,b, S2-S6:</b> Observed (red) and simulated (blue) PXRD of <b>1a,b, 2-6</b> .....      | 2      |
| <b>Figure S7-S11:</b> Packing views of <b>2-6</b> .....                                              | 5      |
| <b>Figs. S12-S14:</b> Luminescence excitation and emission spectra of <b>2, 4</b> and <b>5</b> . ... | 8      |
| <b>Tables S1-S5:</b> Non-coordinative interactions of <b>2-6</b> .....                               | 9      |

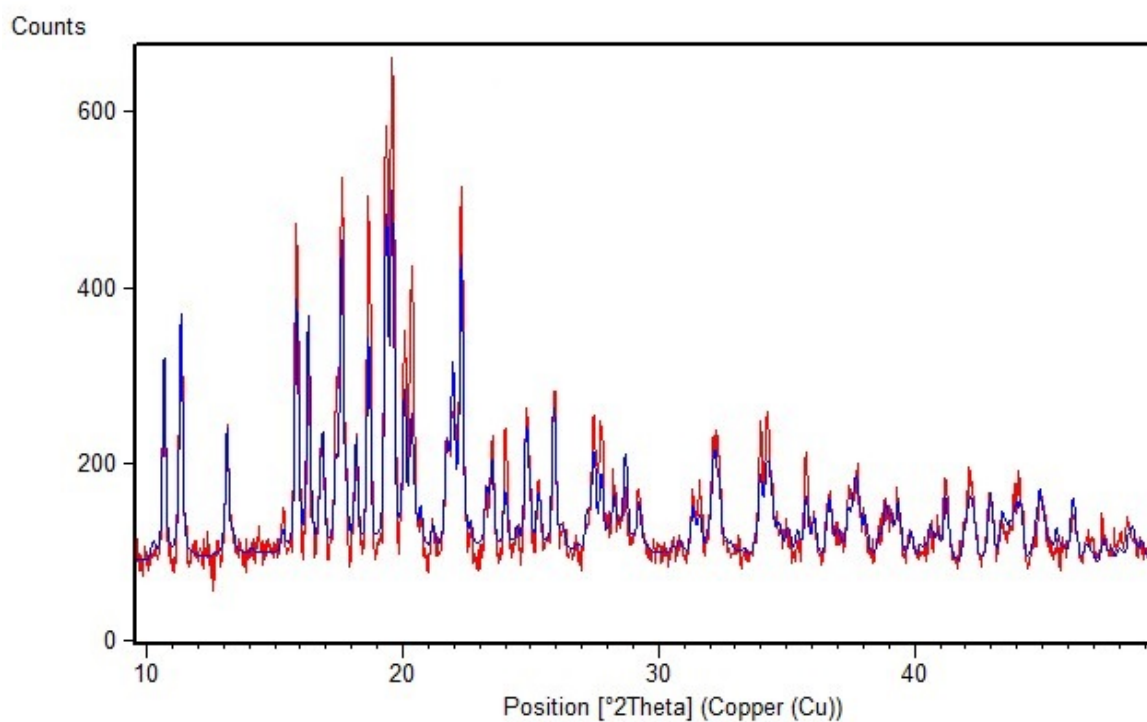

**Figure S1a:** Observed (red) and simulated (blue) PXRD of **1a**

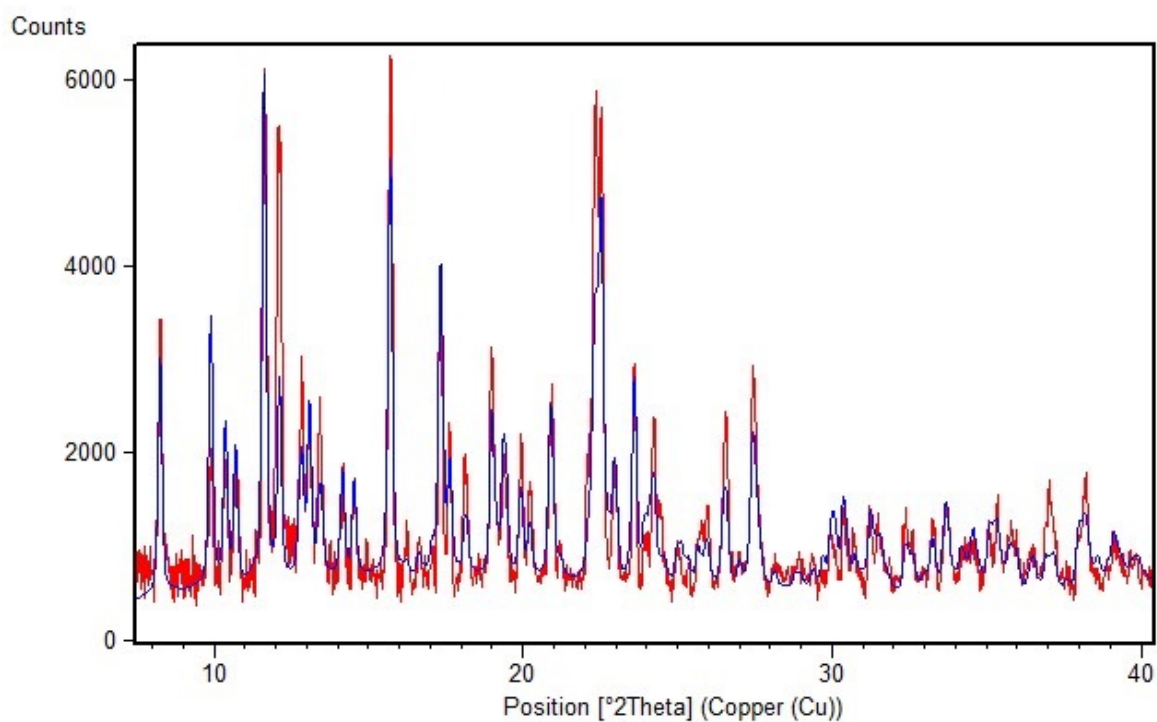

**Figure S1b:** Observed (red) and simulated (blue) PXRD of **1b**

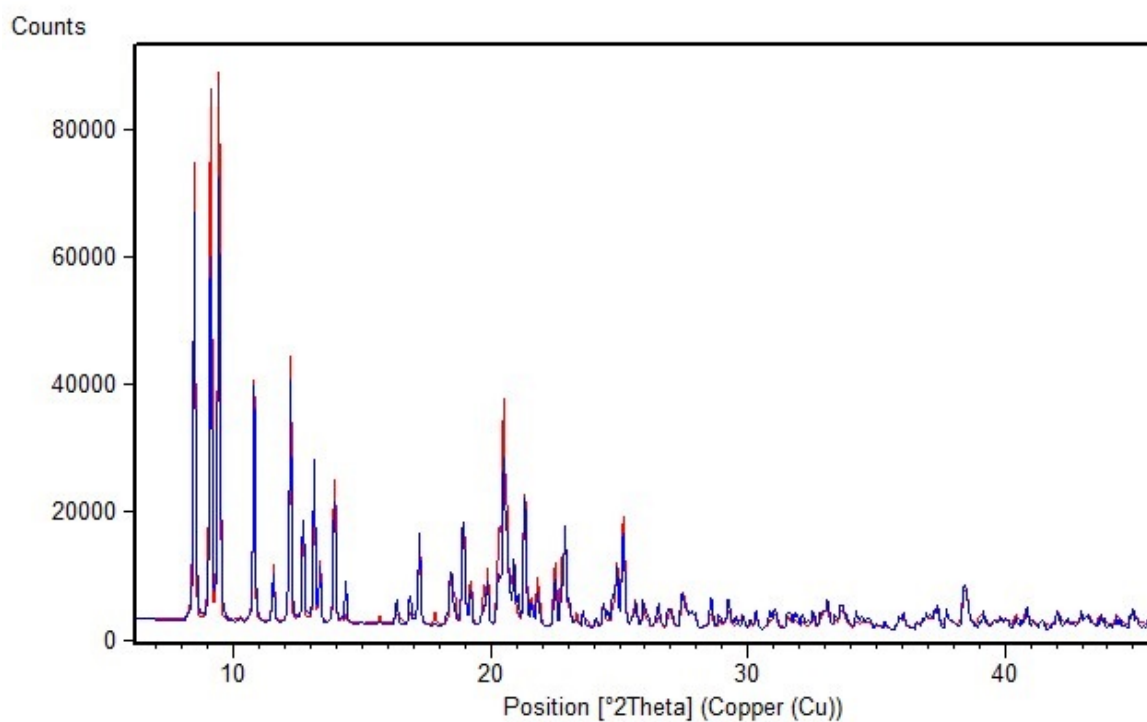

**Figure S2:** Observed (red) and simulated (blue) PXRD of **2**.

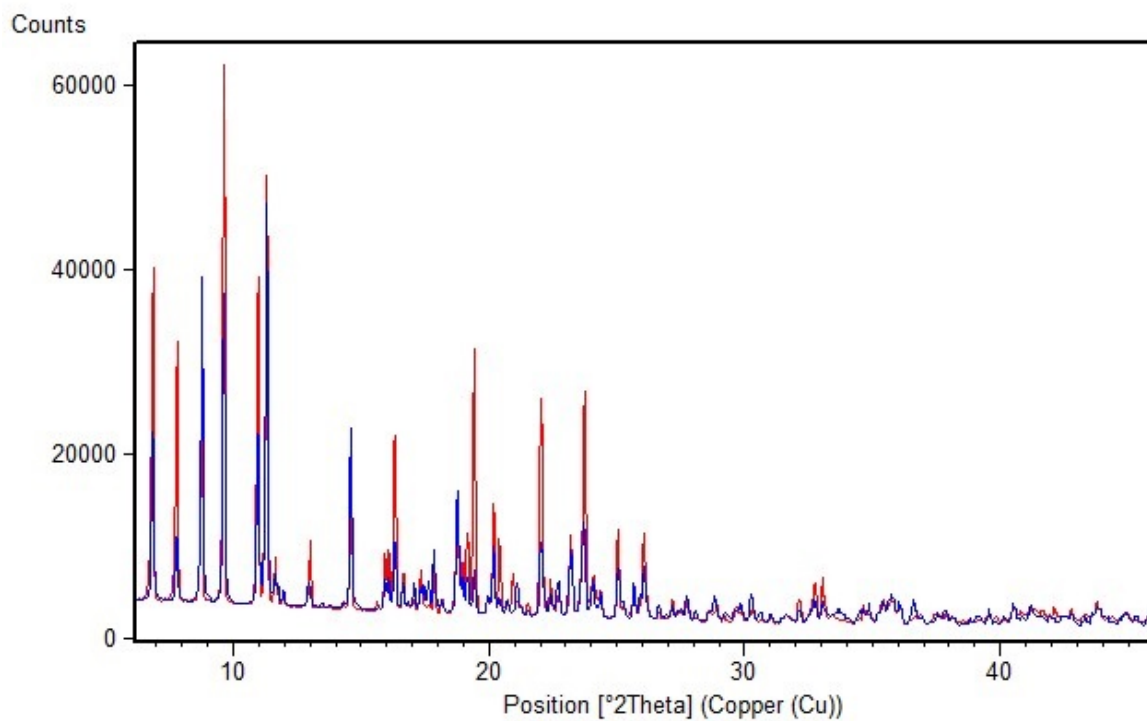

**Figure S3:** Observed (red) and simulated (blue) PXRD of **3**.

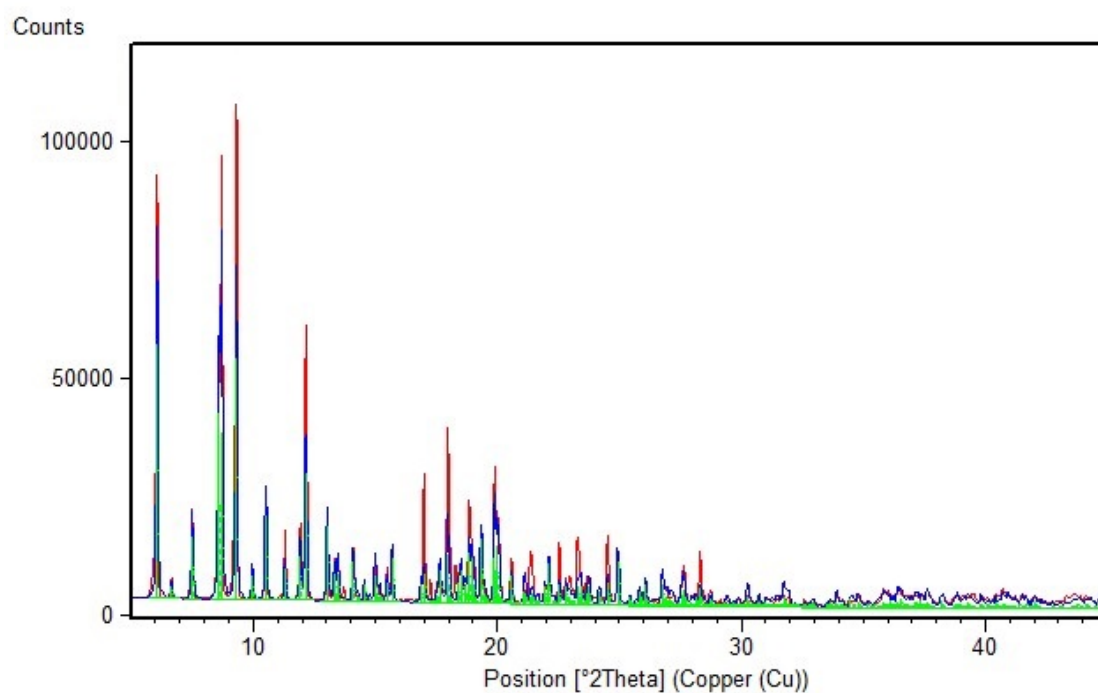

**Figure S4:** Observed (red) and simulated (blue) PXRD of **4**.

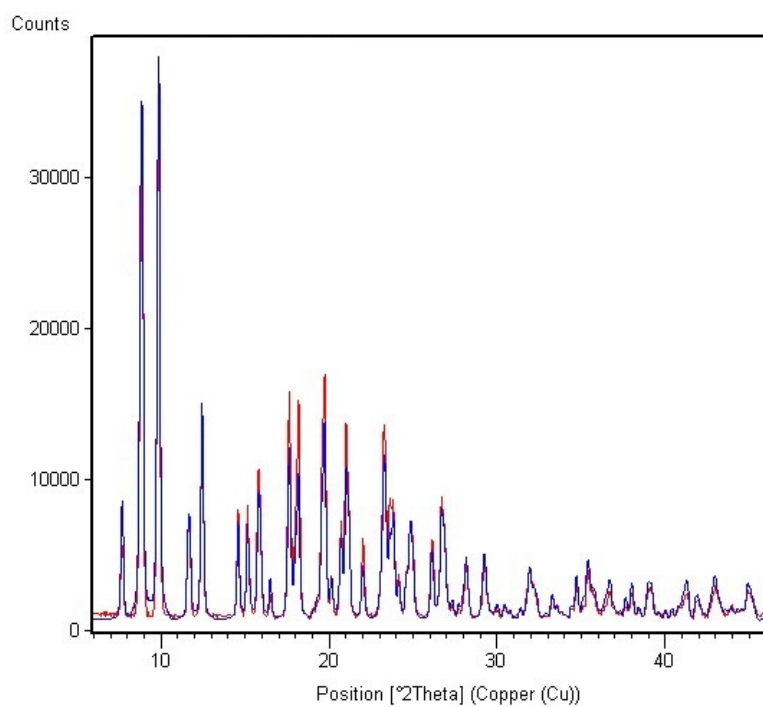

**Figure S5:** Observed (red) and simulated (blue) PXRD of **5**.

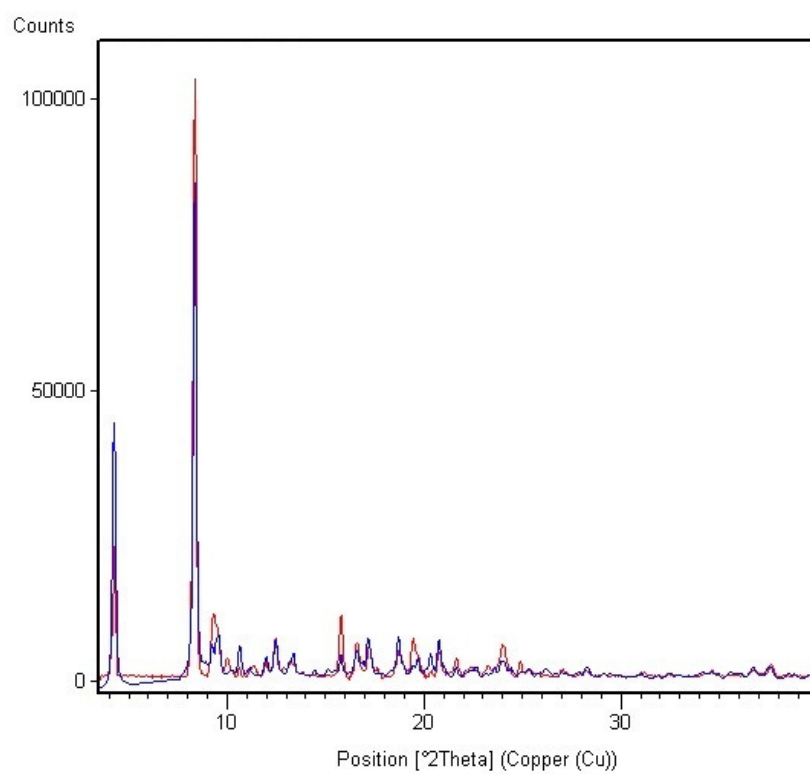

**Figure S6:** Observed (red) and simulated (blue) PXRD of **6**.

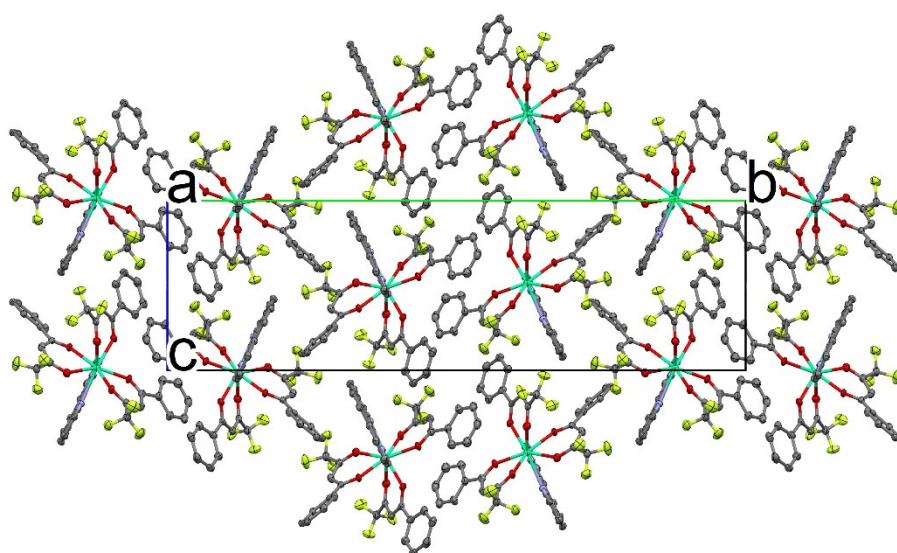

**Figure S7:** Packing view of **2**.

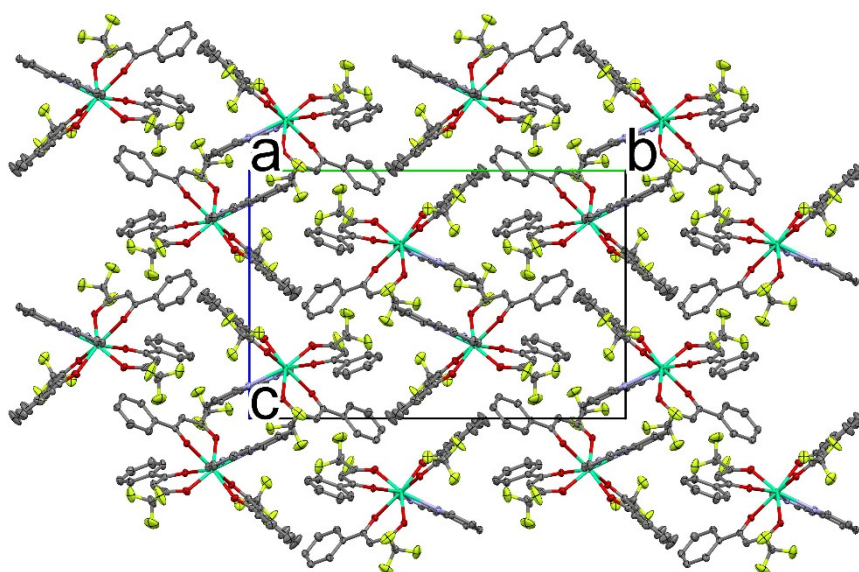

**Figure S8:** Packing view of **3**.

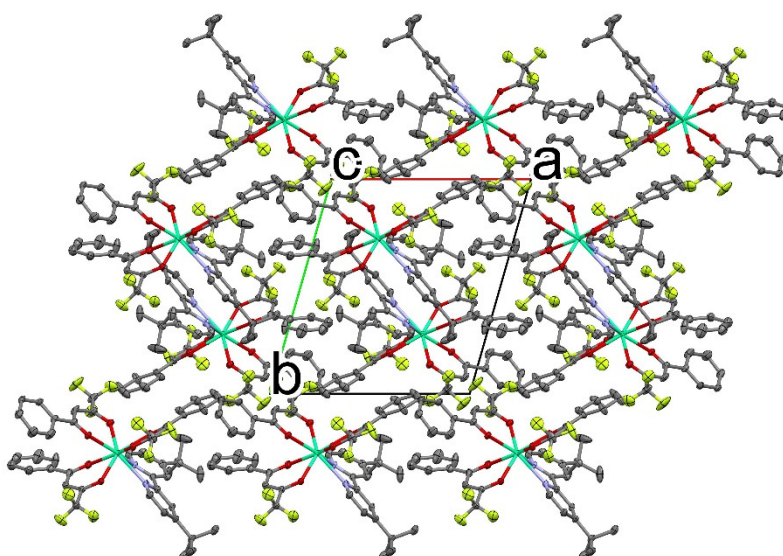

**Figure S9:** Packing view of **4**.



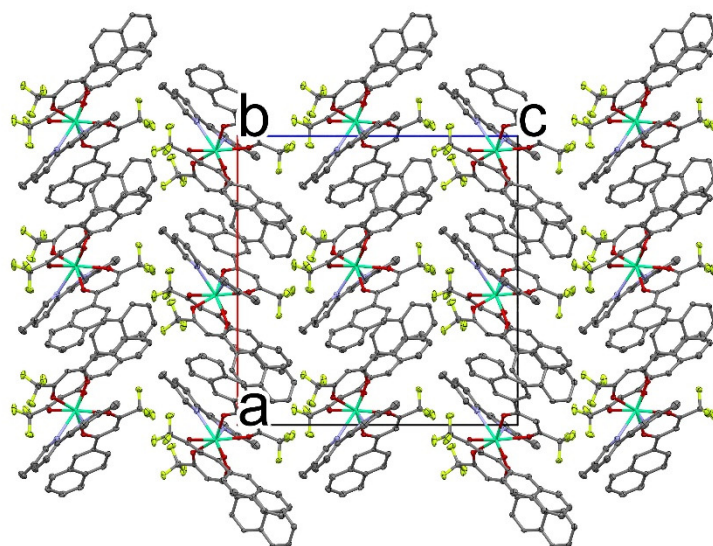

**Figure S10:** Packing view of **5**.

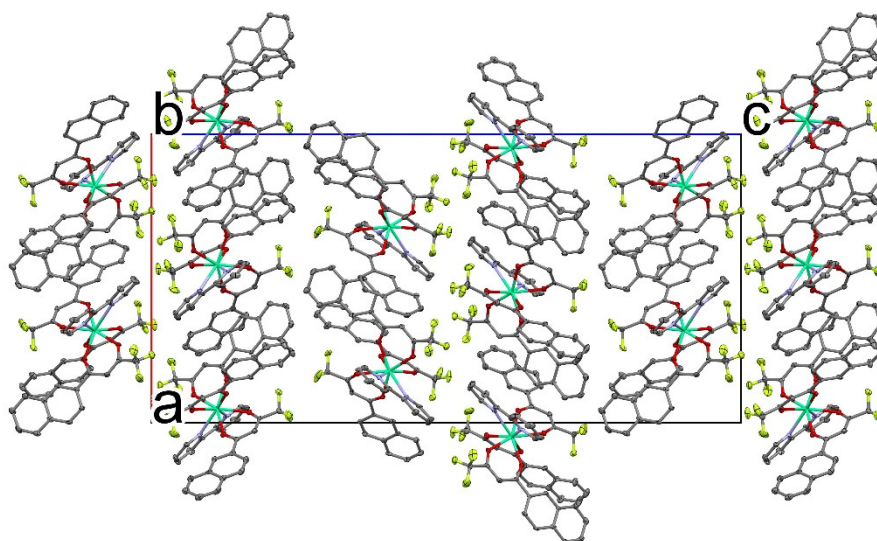

**Figure S11:** Packing view of **6**.

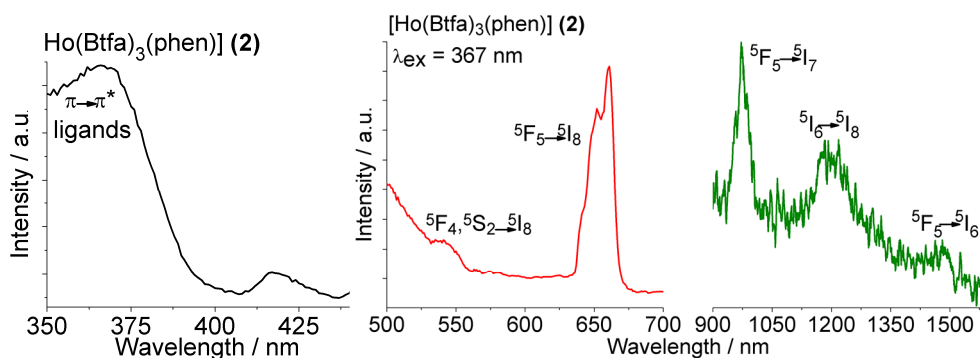

**Figure S12.** Luminescence excitation (black line), emission in the Visible range (red line) and emission in the NIR range (green line) spectra for compound **2**.

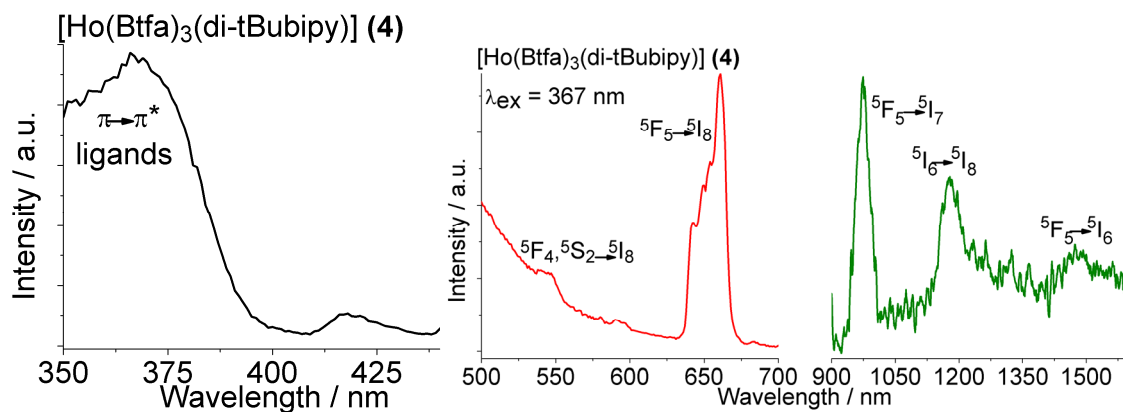

**Figure S13.** Luminescence excitation (black line), emission in the Visible range (red line) and emission in the NIR range (green line) spectra for compound **4**.

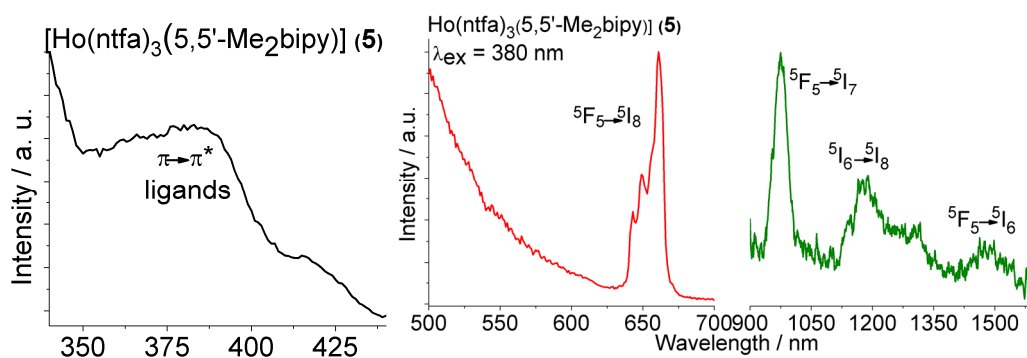

**Figure S14.** Luminescence excitation (black line), emission in the Visible range (red line) and emission in the NIR range (green line) spectra for compound **5**.



**Table S1.** Non-coordinative interactions of **2**.

Analysis of Ring-Ring Interactions

|                       |                                                                           |     |     |     |     |     |     |     |     |     |               |
|-----------------------|---------------------------------------------------------------------------|-----|-----|-----|-----|-----|-----|-----|-----|-----|---------------|
| 6-Membered Ring ( 1)  | N1                                                                        | --> | C31 | --> | C32 | --> | C33 | --> | C34 | --> | C42 (phen)    |
| 6-Membered Ring ( 2)  | N2                                                                        | --> | C40 | --> | C39 | --> | C38 | --> | C37 | --> | C41 (phen)    |
| 6-Membered Ring ( 4)  | C15                                                                       | --> | C16 | --> | C17 | --> | C18 | --> | C19 | --> | C20 (benzene) |
| 6-Membered Ring ( 5)  | C25                                                                       | --> | C26 | --> | C27 | --> | C28 | --> | C29 | --> | C30 (benzene) |
| 14-Membered Ring ( 9) | N1->C31->C32->C33->C34->C35->C36->C37->C38->C39->C40->N2->C41->C42 (phen) |     |     |     |     |     |     |     |     |     |               |

Cg(I) = Plane number I (= ring number in () above); Cg-Cg = Distance between ring Centroids (Ang.)

|            |        |          |                  |  |  |
|------------|--------|----------|------------------|--|--|
| Cg(I)      | Cg(J)  | [ARU(J)] | Cg-Cg            |  |  |
| Cg1 -> Cg5 | [4565] | 3.967(4) | (phen---benzene) |  |  |
| Cg5 -> Cg9 | [4564] | 3.977(3) | (benzene---phen) |  |  |

|        |   |                |
|--------|---|----------------|
| [1556] | = | X,Y,1+Z        |
| [4565] | = | X,3/2-Y,1/2+Z  |
| [1555] | = | X,Y,Z          |
| [3666] | = | 1-X,1-Y,1-Z    |
| [1554] | = | X,Y,-1+Z       |
| [4564] | = | X,3/2-Y,-1/2+Z |

Analysis of X-H(F)...Cg(Ring) Interactions

|                                                                                                  |        |          |          |            |          |
|--------------------------------------------------------------------------------------------------|--------|----------|----------|------------|----------|
| Cg(J) = Center of gravity of ring J (Plane number above); X..Cg = Distance of X to Cg (Angstrom) |        |          |          |            |          |
| H-Perp = Perpendicular distance of H to ring plane J; X-H(F)..Cg = X-H(F)-Cg angle (degrees)     |        |          |          |            |          |
| X--H(I)                                                                                          | Cg(J)  | [ARU(J)] | H(F)..Cg | X-H(F)..Cg | X..Cg    |
| C20 -H20->Cg1                                                                                    | [1554] | 2.75     | -        | 138        | 3.512(8) |
| C33 -H33->Cg5                                                                                    | [1556] | 2.54     | -        | 168        | 3.474(8) |
| C1 -F1-> Cg2                                                                                     | [1455] | 3.767(6) |          | 115.0(4)   | 4.496(9) |
| C11 -F6-> Cg4                                                                                    | [1455] | 3.658(6) |          | 162.4(5)   | 4.930(8) |

|        |   |          |
|--------|---|----------|
| [1554] | = | X,Y,-1+Z |
| [1556] | = | X,Y,1+Z  |
| [1455] | = | -1+X,Y,Z |

Cg(I) refer to Ring Centre-of-Gravity numbers given in () in Ring-Analysis above

|       |           |            |             |
|-------|-----------|------------|-------------|
| Cg(I) | x         | y          | z           |
| Cg1   | 0.5605(3) | 0.66637(7) | 0.8085(3)   |
| Cg2   | 0.8514(3) | 0.63439(7) | 0.5585(3)   |
| Cg4   | 0.7251(4) | 0.56528(8) | 0.0489(3)   |
| Cg5   | 0.6868(3) | 0.73885(8) | 0.1757(3)   |
| Cg9   | 0.7329(2) | 0.65352(5) | 0.70394(18) |

Analysis of Potential Hydrogen Bonds

|                    |             |       |       |          |           |
|--------------------|-------------|-------|-------|----------|-----------|
| Donor--H..Acceptor | [ARU ]      | D - H | H...A | D...A    | D - H...A |
| C3 --H3            | ..F3 [ ]    | 0.95  | 2.33  | 2.707(9) | 103       |
| C13 --H13          | ..F5 [ ]    | 0.95  | 2.42  | 2.764(9) | 101       |
| C23 --H23          | ..F8 [ ]    | 0.95  | 2.39  | 2.741(9) | 101       |
| C27 --H27          | ..O6 [4564] | 0.95  | 2.60  | 3.540(9) | 171       |
| C28 --H28          | ..F7 [4664] | 0.95  | 2.47  | 3.390(9) | 164       |
| C38 --H38          | ..O1 [1655] | 0.95  | 2.52  | 3.237(9) | 132       |
| C38 --H38          | ..O5 [1655] | 0.95  | 2.59  | 3.393(9) | 143       |
| C40 --H40          | ..O4 [ ]    | 0.95  | 2.43  | 3.094(9) | 127       |

Translation of ARU-Code to CIF and Equivalent Position Code

|        |   |         |   |                  |
|--------|---|---------|---|------------------|
| [4564] | = | [4_575] | = | x,3/2-y,-1/2+z   |
| [1655] | = | [1_655] | = | 1+x,y,z          |
| [4664] | = | [4_675] | = | 1+x,3/2-y,-1/2+z |

**Table S2.** Non-coordinative interactions of **3**.

| Analysis of Ring-Ring Interactions                                                                 |              |                |             |                   |          |               |
|----------------------------------------------------------------------------------------------------|--------------|----------------|-------------|-------------------|----------|---------------|
| 6-Membered Ring ( 1)                                                                               | N1 -->       | C31 -->        | C32 -->     | C33 -->           | C34 -->  | C35 (bipy)    |
| 6-Membered Ring ( 2)                                                                               | N2 -->       | C36 -->        | C37 -->     | C38 -->           | C39 -->  | C40 (bipy)    |
| 6-Membered Ring ( 4)                                                                               | C15 -->      | C16 -->        | C17 -->     | C18 -->           | C19 -->  | C20 (benzene) |
| 6-Membered Ring ( 5)                                                                               | C25 -->      | C26 -->        | C27 -->     | C28 -->           | C29 -->  | C30 (benzene) |
| Cg(I) = Plane number I (= ring number in () above); Cg-Cg = Distance between ring Centroids (Ang.) |              |                |             |                   |          |               |
| Cg(I)                                                                                              | Cg(J)        | [ARU(J)]       | Cg-Cg       |                   |          |               |
| Cg1                                                                                                | -> Cg2       | [3666]         | 3.8412(17)  | (bipy---bipy)     |          |               |
| Cg4                                                                                                | -> Cg4       | [3665]         | 4.087(2)    | (benzene-benzene) |          |               |
| Cg4                                                                                                | -> Cg5       | [2555]         | 4.102(2)    | (benzene-benzene) |          |               |
| [3666] = 1-X,1-Y,1-Z                                                                               |              |                |             |                   |          |               |
| [3665] = 1-X,1-Y,-Z                                                                                |              |                |             |                   |          |               |
| [2555] = 1/2-X,1/2+Y,1/2-Z                                                                         |              |                |             |                   |          |               |
| The Cg(I) refer to Ring Centre-of-Gravity numbers given in () in the Ring-Analysis above           |              |                |             |                   |          |               |
| Cg(I)                                                                                              | x            | y              | z           |                   |          |               |
| Cg1                                                                                                | 0.62812(12)  | 0.44336(6)     | 0.33841(8)  |                   |          |               |
| Cg2                                                                                                | 0.36322(12)  | 0.55732(6)     | 0.40843(8)  |                   |          |               |
| Cg4                                                                                                | 0.44718(14)  | 0.57478(8)     | 0.05710(11) |                   |          |               |
| Cg5                                                                                                | -0.09645(13) | 0.21271(6)     | 0.28183(9)  |                   |          |               |
| Analysis of Potential Hydrogen Bonds                                                               |              |                |             |                   |          |               |
| Donor                                                                                              | --- H....    | Acceptor [ARU] | D - H       | H...A             | D...A    | D - H...A     |
| C3                                                                                                 | --H3         | ..F2 [ ]       | 0.95        | 2.44              | 2.763(4) | 100           |
| C10                                                                                                | --H10        | ..O2 [ ]       | 0.95        | 2.42              | 2.740(4) | 1             |
| C13                                                                                                | --H13        | ..F6 [ ]       | 0.95        | 2.39              | 2.744(4) | 102           |
| C23                                                                                                | --H23        | ..F9 [ ]       | 0.95        | 2.35              | 2.719(4) | 102           |
| C26                                                                                                | --H26        | ..F1 [ ]       | 0.95        | 2.55              | 3.343(4) | 141           |
| C31                                                                                                | --H31        | ..F7 [ ]       | 0.95        | 2.47              | 3.392(4) | 163           |
| C31                                                                                                | --H31        | ..O5 [ ]       | 0.95        | 2.49              | 3.130(4) | 124           |
| C39                                                                                                | --H39        | ..F1 [3566]    | 0.95        | 2.46              | 3.311(4) | 149           |
| [3566] = [3_566] = -x,1-y,1-z                                                                      |              |                |             |                   |          |               |

**Table S3.** Non-coordinative interactions of **4**.

| Analysis of Ring-Ring Interactions and Potential Hydrogen bonds.—No Ring-Ring interactions observed ! |         |          |        |       |       |          |           |
|-------------------------------------------------------------------------------------------------------|---------|----------|--------|-------|-------|----------|-----------|
| Donor                                                                                                 | --H.... | Acceptor | [ARU]  | D - H | H...A | D...A    | D - H...A |
| C3                                                                                                    | --H3    | ..F3     | [ ]    | 0.95  | 2.38  | 2.746(7) | 103       |
| C13                                                                                                   | --H13   | ..F5     | [ ]    | 0.95  | 2.45  | 2.775(7) | 100       |
| C20                                                                                                   | --H20   | ..O4     | [ ]    | 0.95  | 2.41  | 2.730(8) | 100       |
| C23                                                                                                   | --H23   | ..F9     | [ ]    | 0.95  | 2.36  | 2.728(6) | 103       |
| C28                                                                                                   | --H28   | ..F1     | [2656] | 0.95  | 2.51  | 3.428(8) | 162       |
| C41                                                                                                   | --H41   | ..O1     | [ ]    | 0.95  | 2.53  | 3.011(6) | 112       |
| C43                                                                                                   | --H43A  | ..F3     | [1665] | 0.98  | 2.48  | 3.367(9) | 151       |
| C45                                                                                                   | --H45A  | ..F6     | [2665] | 0.98  | 2.53  | 3.456(8) | 157       |
| Translation of ARU-Code to CIF and Equivalent Position Code                                           |         |          |        |       |       |          |           |
| [2656] = [2_656] = 1-x,-y,1-z                                                                         |         |          |        |       |       |          |           |
| [2665] = [2_665] = 1-x,1-y,-z                                                                         |         |          |        |       |       |          |           |
| [1665] = [1_665] = 1+x,1+y,z                                                                          |         |          |        |       |       |          |           |

**Table S4.** Non-coordinative interactions of **5**.

| Analysis of Ring-Ring Interactions                                                                 |                 |             |                               |            |           |                                               |
|----------------------------------------------------------------------------------------------------|-----------------|-------------|-------------------------------|------------|-----------|-----------------------------------------------|
| 6-Membered Ring ( 1)                                                                               | N1              | --> C43     | --> C44                       | --> C45    | --> C46   | --> C47 (Me2bipy)                             |
| 6-Membered Ring ( 3)                                                                               | C5              | --> C6      | --> C7                        | --> C12    | --> C13   | --> C14                                       |
| 6-Membered Ring ( 4)                                                                               | C7              | --> C8      | --> C9                        | --> C10    | --> C11   | --> C12                                       |
| 6-Membered Ring ( 5)                                                                               | C19             | --> C20     | --> C21                       | --> C26    | --> C27   | --> C28                                       |
| 6-Membered Ring ( 7)                                                                               | C33             | --> C34     | --> C35                       | --> C40    | --> C41   | --> C42                                       |
| 10-Membered Ring ( 9)                                                                              | C5              | ->C6        | ->C7                          | ->C8       | ->C9      | ->C10 ->C11 ->C12 ->C13 ->C14 (naphthalene A) |
| 10-Membered Ring (10)                                                                              | C19             | ->C20       | ->C21                         | ->C22      | ->C23     | ->C24 ->C25 ->C26 ->C27 ->C28 (naphthalene B) |
| 10-Membered Ring (11)                                                                              | C33             | ->C34       | ->C35                         | ->C36      | ->C37     | ->C38 ->C39 ->C40 ->C41 ->C42 (naphthalene C) |
| Cg(I) = Plane number I (= ring number in () above); Cg-Cg = Distance between ring Centroids (Ang.) |                 |             |                               |            |           |                                               |
| Cg(I)                                                                                              | Cg(J)           | [ARU(J)]    | Cg-Cg                         |            |           |                                               |
| Cg5 -> Cg7                                                                                         | [4465]          | 3.614(3)    | (naphthalene B-Naphthalene C) |            |           |                                               |
| Cg5 -> Cg8                                                                                         | [4465]          | 3.850(3)    | (naphthalene B-Naphthalene C) |            |           |                                               |
| Cg5 -> Cg11                                                                                        | [4465]          | 3.527(3)    | (naphthalene B-Naphthalene C) |            |           |                                               |
| Cg7 -> Cg10                                                                                        | [4565]          | 3.520(3)    | (naphthalene C-Naphthalene B) |            |           |                                               |
| Cg10 -> Cg11                                                                                       | [4465]          | 3.805(3)    | (naphthalene B-Naphthalene C) |            |           |                                               |
| [4465] = -1/2+X,1-Y,Z                                                                              |                 |             |                               |            |           |                                               |
| [4565] = 1/2+X,1-Y,Z                                                                               |                 |             |                               |            |           |                                               |
| Analysis of X-H(F)...Cg(Ring) Interactions                                                         |                 |             |                               |            |           |                                               |
| Cg(J) = Center of gravity of ring J (Plane number above); X..Cg = Distance of X to Cg (Angstrom)   |                 |             |                               |            |           |                                               |
| H-Perp = Perpendicular distance of H to ring plane J; X-H(F)..Cg = X-H(F)-Cg angle (degrees)       |                 |             |                               |            |           |                                               |
| X--H(I)                                                                                            | Cg(J)           | [ARU(J)]    | H(F)..Cg                      | X-H(F)..Cg | X..Cg     |                                               |
| C39 -H39 -> Cg3                                                                                    | [4565]          |             | 147                           |            | 3.734(6)  |                                               |
| C51 -H51 -> Cg7                                                                                    | [1565]          |             | 116                           |            | 3.383(8)  |                                               |
| C54 -H54A-> Cg5                                                                                    | [1565]          |             | 117                           |            | 3.530(8)  |                                               |
| C1 -F2 -> Cg4                                                                                      | [3554]          | 3.026(4)    | 123.5(3)                      |            | 3.930(6)  |                                               |
| C1 -F2 -> Cg9                                                                                      | [3554]          | 3.382(4)    | 140.6(3)                      |            | 4.502(6)  |                                               |
| C29 -F7 -> Cg1                                                                                     | [2675]          | 3.520(4)    | 136.3(3)                      |            | 4.581(6)  |                                               |
| [4565] = 1/2+X,1-Y,Z                                                                               |                 |             | [1565] = X,1+Y,Z              |            |           |                                               |
| [3554] = 1/2-X,Y,-1/2+Z                                                                            |                 |             | [2675] = 1-X,2-Y,1/2+Z        |            |           |                                               |
| The Cg(I) refer to Ring Centre-of-Gravity numbers given in () in Ring-Analysis                     |                 |             |                               |            |           |                                               |
| Cg(I)                                                                                              | x               | y           | z                             |            |           |                                               |
| Cg1                                                                                                | 0.60027(12)     | 0.9548(2)   | 0.31663(12)                   |            |           |                                               |
| Cg3                                                                                                | 0.19448(12)     | 0.98730(18) | 0.54165(12)                   |            |           |                                               |
| Cg4                                                                                                | 0.14285(12)     | 0.90755(19) | 0.64372(12)                   |            |           |                                               |
| Cg5                                                                                                | 0.29302(12)     | 0.44840(18) | 0.51408(12)                   |            |           |                                               |
| Cg7                                                                                                | 0.62682(12)     | 0.46228(19) | 0.47217(13)                   |            |           |                                               |
| Cg9                                                                                                | 0.16861(9)      | 0.94699(15) | 0.59251(9)                    |            |           |                                               |
| Cg10                                                                                               | 0.26226(9)      | 0.43545(15) | 0.56700(9)                    |            |           |                                               |
| Cg11                                                                                               | 0.66140(9)      | 0.41067(15) | 0.43140(10)                   |            |           |                                               |
| Analysis of Potential Hydrogen Bonds                                                               |                 |             |                               |            |           |                                               |
| Donor                                                                                              | --H....Acceptor | D - H       | H...A                         | D...A      | D - H...A |                                               |
| C3                                                                                                 | --H3 ..F1       | 0.95        | 2.43                          | 2.753(7)   | 100       |                                               |
| C17                                                                                                | --H17 ..F5      | 0.95        | 2.35                          | 2.720(7)   | 103       |                                               |
| C31                                                                                                | --H31 ..F9      | 0.95        | 2.40                          | 2.760(7)   | 102       |                                               |
| C34                                                                                                | --H34 ..O6      | 0.95        | 2.36                          | 2.712(6)   | 101       |                                               |
| C47                                                                                                | --H47 ..O3      | 0.95        | 2.50                          | 3.045(7)   | 117       |                                               |

**Table S5.** Non-coordinative interactions of **6**.

| Analysis of Ring-Ring Interactions                                                                 |         |          |                          |            |           |     |      |     |                                     |
|----------------------------------------------------------------------------------------------------|---------|----------|--------------------------|------------|-----------|-----|------|-----|-------------------------------------|
| 6-Membered Ring ( 3)                                                                               | C5      | -->      | C6                       | -->        | C7        | --> | C12  | --> | C13 --> C14                         |
| 6-Membered Ring ( 5)                                                                               | C19     | -->      | C20                      | -->        | C21       | --> | C26  | --> | C27 --> C28                         |
| 6-Membered Ring ( 7)                                                                               | C33     | -->      | C34                      | -->        | C35       | --> | C40  | --> | C41 --> C42                         |
| 6-Membered Ring ( 8)                                                                               | C35     | -->      | C36                      | -->        | C37       | --> | C38  | --> | C39 --> C40                         |
| 10-Membered Ring ( 9)                                                                              | C5      | -->      | C6                       | -->        | C7        | --> | C8   | --> | C9 -->C10 -->C11-->C12-->C13 -->C14 |
| 10-Membered Ring (10)                                                                              | C19     | -->      | C20                      | -->        | C21       | --> | C22  | --> | C23 -->C24 -->C25-->C26-->C27-->C28 |
| 10-Membered Ring (11)                                                                              | C33     | -->      | C34                      | -->        | C35       | --> | C36  | --> | C37 -->C38 -->C39-->C40-->C41-->C42 |
| 6-Membered Ring (13)                                                                               | N4      | -->      | C100                     | -->        | C101      | --> | C102 | --> | C103 --> C104 (bipy)                |
| 6-Membered Ring (14)                                                                               | C57     | -->      | C58                      | -->        | C59       | --> | C64  | --> | C65 --> C66                         |
| 6-Membered Ring (18)                                                                               | C85     | -->      | C86                      | -->        | C87       | --> | C92  | --> | C93 --> C94                         |
| 6-Membered Ring (19)                                                                               | C87     | -->      | C88                      | -->        | C89       | --> | C90  | --> | C91 --> C92                         |
| 10-Membered Ring (20)                                                                              | C57     | -->      | C58                      | -->        | C59       | --> | C60  | --> | C61 -->C62 -->C63-->C64-->C65-->C66 |
| 10-Membered Ring (21)                                                                              | C71     | -->      | C72                      | -->        | C73       | --> | C74  | --> | C75 -->C76 -->C77-->C78-->C79-->C80 |
| 10-Membered Ring (22)                                                                              | C85     | -->      | C86                      | -->        | C87       | --> | C88  | --> | C89 -->C9 -->C91-->C92 -->C93-->C94 |
| HINT: 10-membered rings (9, 10, 11, 20, 21, 22 refer to naphthalene rings A,B,C,D,E,F, resp.)      |         |          |                          |            |           |     |      |     |                                     |
| Cg(I) = Plane number I (= ring number in () above); Cg-Cg = Distance between ring Centroids (Ang.) |         |          |                          |            |           |     |      |     |                                     |
| Cg(I)                                                                                              | Cg(J)   | [ARU(J)] | Cg-Cg                    |            |           |     |      |     |                                     |
| Cg3                                                                                                | -> Cg7  | [4545]   | 3.659(5)                 |            |           |     |      |     |                                     |
| Cg3                                                                                                | -> Cg8  | [4545]   | 3.935(5)                 |            |           |     |      |     |                                     |
| Cg3                                                                                                | -> Cg11 | [4545]   | 3.597(5)                 |            |           |     |      |     |                                     |
| Cg7                                                                                                | -> Cg9  | [4445]   | 3.767(5)                 |            |           |     |      |     |                                     |
| Cg16                                                                                               | -> Cg18 | [4465]   | 3.643(5)                 |            |           |     |      |     |                                     |
| Cg16                                                                                               | -> Cg19 | [4465]   | 3.893(5)                 |            |           |     |      |     |                                     |
| Cg16                                                                                               | -> Cg22 | [4465]   | 3.563(4)                 |            |           |     |      |     |                                     |
| Cg18                                                                                               | -> Cg21 | [4565]   | 3.710(5)                 |            |           |     |      |     |                                     |
| [4465] = -1/2+X,3/2-Y,Z                                                                            |         |          | [4545] = 1/2+X,-1/2-Y,Z  |            |           |     |      |     |                                     |
| [4565] = 1/2+X,3/2-Y,Z                                                                             |         |          | [4445] = -1/2+X,-1/2-Y,Z |            |           |     |      |     |                                     |
| Analysis of X-H(F)...Cg(Ring) Interactions                                                         |         |          |                          |            |           |     |      |     |                                     |
| Cg(J) = Center of gravity of ring J (Plane number above); X..Cg = Distance of X to Cg (Angstrom)   |         |          |                          |            |           |     |      |     |                                     |
| H-Perp = Perpendicular distance of H to ring plane J; X-H(F)..Cg = X-H(F)-Cg angle (degrees)       |         |          |                          |            |           |     |      |     |                                     |
| X--H(I)                                                                                            | Cg(J)   | [ARU(J)] | H(F)..Cg                 | X-H(F)..Cg | X..Cg     |     |      |     |                                     |
| C11 -H11 ->                                                                                        | Cg5     | [1545]   | 2.85                     | 163        | 3.767(11) |     |      |     |                                     |
| C44 -H44 ->                                                                                        | Cg7     | [1565]   | 2.79                     | 126        | 3.437(10) |     |      |     |                                     |
| C44 -H44 ->                                                                                        | Cg11    | [1565]   | 2.89                     | 140        | 3.667(11) |     |      |     |                                     |
| C46 -H46 ->                                                                                        | Cg3     | [1565]   | 2.86                     | 112        | 3.343(10) |     |      |     |                                     |
| C49 -H49 ->                                                                                        | Cg8     | [1565]   | 2.88                     | 132        | 3.591(12) |     |      |     |                                     |
| C66 -H66 ->                                                                                        | Cg13    | [4455]   | 2.85                     | 137        | 3.602(9)  |     |      |     |                                     |
| C77 -H77 ->                                                                                        | Cg14    | [1565]   | 2.52                     | 152        | 3.394(10) |     |      |     |                                     |
| C77 -H77 ->                                                                                        | Cg20    | [1565]   | 2.73                     | 139        | 3.510(10) |     |      |     |                                     |
| C96 -H96 ->                                                                                        | Cg18    | [1545]   | 2.xx                     | 129        | 3.465(9)  |     |      |     |                                     |
| C96 -H96 ->                                                                                        | Cg22    | [1545]   | 2.xx                     | 141        | 3.742(9)  |     |      |     |                                     |
| C101-H101 ->                                                                                       | Cg19    | [1545]   | 2.86                     | 131        | 3.553(11) |     |      |     |                                     |
| [1545] = X,-1+Y,Z                                                                                  |         |          |                          |            |           |     |      |     |                                     |
| [1565] = X,1+Y,Z                                                                                   |         |          |                          |            |           |     |      |     |                                     |
| [4455] = -1/2+X,1/2-Y,Z                                                                            |         |          |                          |            |           |     |      |     |                                     |
| [1565] = X,1+Y,Z                                                                                   |         |          |                          |            |           |     |      |     |                                     |

[1545] = X, -1+Y, Z

Cg(I) refer to Ring Centre-of-Gravity numbers given in ( ) in Ring-Analysis

| Cg(I) | x           | y          | z           |
|-------|-------------|------------|-------------|
| Cg3   | 0.68668(17) | -0.3170(3) | 0.65482(8)  |
| Cg5   | 0.80662(16) | 0.2226(3)  | 0.66122(8)  |
| Cg7   | 0.35118(18) | -0.2548(3) | 0.62918(8)  |
| Cg8   | 0.2855(2)   | -0.3580(4) | 0.58943(10) |
| Cg9   | 0.71083(16) | -0.3391(3) | 0.68042(7)  |
| Cg10  | 0.82885(14) | 0.1763(3)  | 0.68520(6)  |
| Cg11  | 0.31826(15) | -0.3064(3) | 0.60931(7)  |
| Cg13  | 0.95363(19) | 0.2064(4)  | 0.45126(9)  |
| Cg14  | 0.56390(16) | 0.2664(3)  | 0.35022(8)  |
| Cg18  | 1.01688(17) | 0.7607(3)  | 0.38548(8)  |
| Cg19  | 1.08335(17) | 0.8633(3)  | 0.42543(9)  |
| Cg20  | 0.54546(14) | 0.2814(3)  | 0.32306(7)  |
| Cg21  | 0.65600(15) | 0.8533(3)  | 0.33865(7)  |
| Cg22  | 1.05013(13) | 0.8117(2)  | 0.40543(7)  |

#### Analysis of Potential Hydrogen Bonds

| Donor | --H....Acceptor | [ARU]        | D - H | H...A | D...A     | D - H...A |
|-------|-----------------|--------------|-------|-------|-----------|-----------|
| C3    | --H3            | ..F2 [ ]     | 0.95  | 2.39  | 2.756(12) | 102       |
| C8    | --H8            | ..F18 [3645] | 0.95  | 2.50  | 3.212(13) | 132       |
| C17   | --H17           | ..F9 [ ]     | 0.95  | 2.41  | 2.757(12) | 101       |
| C20   | --H20           | ..O4 [ ]     | 0.95  | 2.33  | 2.671(10) | 100       |
| C27   | --H27           | ..O6 [4555]  | 0.95  | 2.57  | 3.356(10) | 140       |
| C31   | --H31           | ..F5 [ ]     | 0.95  | 2.35  | 2.730(11) | 103       |
| C34   | --H34           | ..O6 [ ]     | 0.95  | 2.38  | 2.734(10) | 102       |
| C36   | --H36           | ..F14 [4455] | 0.95  | 2.46  | 3.402(12) | 170       |
| C47   | --H47           | ..O5 [ ]     | 0.95  | 2.58  | 3.029(12) | 109       |
| C52   | --H52           | ..O1 [ ]     | 0.95  | 2.58  | 3.142(12) | 118       |
| C55   | --H55           | ..F11 [ ]    | 0.95  | 2.37  | 2.740(11) | 103       |
| C69   | --H69           | ..F15 [ ]    | 0.95  | 2.36  | 2.717(11) | 101       |
| C83   | --H83           | ..F17 [ ]    | 0.95  | 2.34  | 2.719(12) | 103       |
| C86   | --H86           | ..O12 [ ]    | 0.95  | 2.39  | 2.724(10) | 100       |
| C88   | --H88           | ..F1 [4555]  | 0.95  | 2.47  | 3.398(11) | 164       |
| C99   | --H99           | ..O11 [ ]    | 0.95  | 2.59  | 3.030(10) | 109       |
| C104  | --H104          | ..O9 [ ]     | 0.95  | 2.53  | 3.117(11) | 120       |

No Classic Hydrogen Bonds Found

Translation of ARU-Code to CIF and Equivalent Position Code

[4455] = [3\_455] = -1/2+x, 1/2-y, z  
 [3645] = [4\_645] = 3/2-x, -1/2+y, 1/2+z  
 [4555] = [3\_555] = 1/2+x, 1/2-y, z
